# Supplementary material for: Cytokine, Chemokine, and Metalloprotease Activation in the Serum of Patients with Nephropathia Epidemica from the Republic of Tatarstan and the Republic of Mordovia, Russia
Source: MDPI journal article supplement (doi:10.3390/pathogens10050527), 2021-04-27
Supplement: s1 [file s1]

**Supplementary Table 1. Analysis of acute serum cytokine and MMPs levels in RT and RM controls**

| Cytokine (pg/mL) | RT control (n-27)     | RM control (n -19)     | P. adjust |
|------------------|-----------------------|------------------------|-----------|
| IL-1 $\alpha$    | 0.91 $\pm$ 0.86       | 0.64 $\pm$ 1.4         | 0.02      |
| IL-1 $\beta$     | 5.59 $\pm$ 10.42      | 1.57 $\pm$ 0.82        |           |
| IL-1ra           | 84.21 $\pm$ 46.27     | 85.95 $\pm$ 47.2       |           |
| IL-2Ra           | 31.72 $\pm$ 25.19     | 47.33737 $\pm$ 57      |           |
| IL-2             | 8.58 $\pm$ 21.08      | 4.54 $\pm$ 3.52        |           |
| IL-3             | 70.49 $\pm$ 54.15     | 45.02 $\pm$ 57.15      |           |
| IL-4             | 4.51 $\pm$ 3.15       | 5.88 $\pm$ 0.99        |           |
| IL-5             | 7.15 $\pm$ 9.19       | 13.93 $\pm$ 20.59      |           |
| IL-6             | 40.46 $\pm$ 68.09     | 24.04 $\pm$ 5.6        | 0.04      |
| sIL-6Ra          | 9226.61 $\pm$ 4935.31 | 11644.65 $\pm$ 2489.66 |           |
| sIL-6Rb          | 3.8 $\pm$ 2.05        | 5.12 $\pm$ 1.39        |           |
| IL-7             | 8.73 $\pm$ 12.02      | 14.64 $\pm$ 7.45       | 0.03      |
| IL-8             | 28.67 $\pm$ 21.92     | 22.23 $\pm$ 19.46      |           |
| IL-9             | 37.8 $\pm$ 33.36      | 57.98 $\pm$ 33.69      |           |
| IL-10            | 4.47 $\pm$ 2.63       | 3.22 $\pm$ 1.95        |           |
| IL-11            | 2.23 $\pm$ 2.92       | 5.28 $\pm$ 8.6         |           |
| IL-12(p70)       | 53.12 $\pm$ 97.25     | 44.56 $\pm$ 20.49      |           |
| IL-12(p40)       | 105.01 $\pm$ 81.16    | 89.59 $\pm$ 109.57     |           |
| IL-13            | 4.88 $\pm$ 2.93       | 6.13 $\pm$ 1.24        |           |
| IL-15            | 20.2 $\pm$ 14.55      | 20.6 $\pm$ 8.58        |           |

|            |               |               |  |
|------------|---------------|---------------|--|
| IL-17      | 19.1±13.18    | 31.68±9.48    |  |
| IL-16      | 111.21±61.26  | 103.53±79.13  |  |
| IL-18      | 8.35±9.1      | 4.23±4.68     |  |
| IL-19      | 8.67±31.78    | 3.3±2.64      |  |
| IL-20      | 40.09±26.08   | 57.85±83.75   |  |
| IL-22      | 9.37±8.33     | 6.65±9.23     |  |
| IL-26      | 2.8±1.63      | 3.75±4.84     |  |
| IL-27(p28) | 14.52±55.69   | 2.043±0.93    |  |
| IL-32      | 35.06±127.7   | 8.66±8.28     |  |
| IL-34      | 101.78±395.27 | 21.35±12.67   |  |
| IL-35      | 27.96±26.87   | 22.07±18.33   |  |
| CCL2       | 44.87±97.65   | 25.15±17.57   |  |
| CCL3       | 9.97±13.34    | 4.57±1.55     |  |
| CCL4       | 83.98±109.86  | 68.31±42.84   |  |
| CCL5       | 190.37±219.53 | 149.05±99.39  |  |
| CCL7       | 19.56±18.7    | 16.21±28.52   |  |
| CCL11      | 127.78±166.58 | 139.9±53.17   |  |
| CCL27      | 80.71±45.97   | 61.52±43.22   |  |
| CXCL1      | 39.74±30.52   | 28.36±20.01   |  |
| CXCL9      | 229.16±259.92 | 266.03±138.96 |  |
| CXCL10     | 181.54±176.06 | 218.47±116.73 |  |
| CXCL12     | 55.5±45.13    | 44.67±56.83   |  |

|                   |                 |                  |       |
|-------------------|-----------------|------------------|-------|
| Chitinase-3-like1 | 14526.85±8536.4 | 14972.82±5142.39 |       |
| CSF               | 34.02±17.09     | 31.73±18.21      |       |
| FGFbasic          | 17.51±17.71     | 19.56±8.97       |       |
| G-CSF             | 25.97±31.11     | 41.53±28.27      |       |
| GM-CSF            | 12.07±15.21     | 18.58±5.7        | 0.002 |
| HGF               | 135.05±130.9    | 105.01±115.09    |       |
| LIF               | 4.2±3.54        | 6.29±7.79        |       |
| M-CSF             | 2.55±1.68       | 3.7±4.26         |       |
| MIF               | 264.73±255.08   | 149.44±103.21    |       |
| b-NGF             | 5.33±17.86      | 1.3±2.44         | 0.02  |
| SCGFb             | 1791.85±2224.11 | 1794.47±1962.12  |       |
| TNFα              | 42.67±85.26     | 40.2±39.05       |       |
| TNFβ              | 1.49±3.72       | 1.12±2.14        |       |
| MMP1              | 69.98±78.9      | 109.47±112.4     |       |
| MMP2              | 130.7±114.3     | 149.65±122.2     |       |
| MMP3              | 459.7±367.6     | 349.75±315.03    |       |
| MMP7              | 186.88±272.6    | 280.81±222.95    |       |
| MMP8              | 47.35±50.5      | 12.82±11.76      |       |
| MMP9              | 1528.8±2417.2   | 2079.49±1165.22  |       |
| MMP10             | 57.6±53.5       | 94.88±119.02     |       |
| MMP12             | 380.87±552.25   | 53.13±19.16      |       |

|             |                    |                   |      |
|-------------|--------------------|-------------------|------|
| MMP13       | 48.74±54.3         | 531.47±408.6      | 0.03 |
| sCD163      | 583.95±434.97      | 724.96±461.65     |      |
| Osteocalcin | 1019.96±1215.6     | 1032.61±478.47    |      |
| Osteopontin | 8423.1±4494.06     | 6695.9±3856.69    |      |
| PDGF-bb     | 577.6±774.39       | 619.6479±527.23   |      |
| Pentaxin-3  | 129.82±125.05      | 207.57±209.65     |      |
| sTNFR1      | 780.56±657.19      | 1098.69±593.68    |      |
| sTNFR2      | 5260.21±2924.97    | 5866.91±4089.69   |      |
| TNFRSF8     | 838.08±1278.79     | 816.89±738.93     |      |
| TNFSF10     | 24.14±14.14        | 31.69±22.63       |      |
| TNFSF13     | 51382.64±165254.05 | 13490.18±18639.03 |      |
| TNFSF13b    | 4151.3±1937.29     | 4343.57±2830.39   |      |
| TNFSF12     | 58.25±75.37        | 52.52±42.82       |      |
| TNFSF14     | 8.01±4.35          | 6.7±2.39          |      |
| TSLP        | 650.35±3265.11     | 20.23±9.58        |      |
| VEGF        | 57.49±55.24        | 59.99±41.2        |      |
| IFN-α2      | 11.31±6.61         | 11.73±9.99        |      |
| IFNβ        | 23.2±15.78         | 26.06±7.77        |      |
| IFNγ        | 41.89±39.56        | 23.4±21.44        |      |
| IFN-h2      | 8.77±11.06         | 13.66±6.02        |      |
| IFN-h1      | 10±10.13           | 14.86±13.26       |      |

**P. adjust – Benjamini-Hochberg adjusted p-value.**

**Supplementary Table 2. Analysis of serum cytokine and MMPs levels in RT and RM acute patients**

| Cytokine (pg/mL) | RT acute<br>(n-98)  | RM acute<br>(n-25)  | P. adjust |
|------------------|---------------------|---------------------|-----------|
| IL-1 $\alpha$    | 0.35 $\pm$ 0.79     | 0.42 $\pm$ 0.39     | 0.003     |
| IL-1 $\beta$     | 26.49 $\pm$ 72.76   | 66.92 $\pm$ 65.26   | <0.0001   |
| IL-1ra           | 8.13 $\pm$ 11.25    | 24.07 $\pm$ 18.25   | 0.0005    |
| IL-2Ra           | 125.83 $\pm$ 125.26 | 139.00 $\pm$ 152.76 |           |
| IL-2             | 20.18 $\pm$ 16.58   | 6.74 $\pm$ 9.99     | <0.0001   |
| IL-3             | 129.38 $\pm$ 101.37 | 108.47 $\pm$ 147.82 |           |
| IL-4             | 19.23 $\pm$ 28.63   | 51.06 $\pm$ 33.49   | <0.0001   |
| IL-5             | 61.53 $\pm$ 76.82   | 84.68 $\pm$ 45.80   | 0.006     |
| IL-6             | 18.32 $\pm$ 31.59   | 92.41 $\pm$ 168.67  | <0.0001   |
| sIL-6Ra          | 63.54 $\pm$ 14.97   | 3.12 $\pm$ 3.11     | <0.0001   |
| sIL-6Rb          | 6.76 $\pm$ 8.77     | 54.14 $\pm$ 18.82   | <0.0001   |
| IL-7             | 48.72 $\pm$ 105.56  | 57.60 $\pm$ 47.22   | 0.048     |
| IL-8             | 47.23 $\pm$ 36.84   | 14.68 $\pm$ 13.96   | <0.0001   |
| IL-9             | 88.65 $\pm$ 95.62   | 231.06 $\pm$ 155.41 | <0.0001   |
| IL-10            | 38.56 $\pm$ 25.27   | 35.19 $\pm$ 27.70   |           |
| IL-11            | 38.37 $\pm$ 33.05   | 28.21 $\pm$ 18.51   |           |
| IL-12(p70)       | 56.73 $\pm$ 49.73   | 16.00 $\pm$ 12.35   | 0.0001    |

|            |                  |                 |         |
|------------|------------------|-----------------|---------|
| IL-12(p40) | 273.16±460.87    | 169.81±134.22   |         |
| IL-13      | 3.14±3.08        | 23.24±23.84     | <0.0001 |
| IL-15      | 814.48±1012.45   | 1525.43±1233.32 |         |
| IL-17      | 73.28±95.95      | 128.07±69.62    | 0.0001  |
| IL-16      | 231.62±339.70    | 170.31±116.09   |         |
| IL-18      | 22.90±27.58      | 23.80±22.48     |         |
| IL-19      | 10.45±7.80       | 21.23±12.77     | 0.005   |
| IL-20      | 1572.18±1356.02  | 475.41±320.87   | 0.006   |
| IL-22      | 237.30±55.74     | 746.94±398.49   | 0.02    |
| IL-26      | 343.55±484.72    | 496.67±440.54   |         |
| IL-27(p28) | 665.58±641.69    | 821.18±676.19   |         |
| IL-32      | 2870.33±1603.01  | 1662.57±1626.24 |         |
| IL-34      | 15534.99±6220.72 | 7214.97±5564.08 | 0.004   |
| IL-35      | 13.22±13.98      | 61.27±62.04     | <0.0001 |
| CCL2       | 162.72±149.97    | 1500.42±801.92  | <0.0001 |
| CCL3       | 561.81±952.47    | 1133.72±1123.01 | 0.04    |
| CCL4       | 1133.73±1367.24  | 4353.96±3455.27 | <0.0001 |
| CCL5       | 370.40±874.51    | 324.46±166.02   | 0.0003  |
| CCL7       | 21.60±35.83      | 28.89±23.91     |         |
| CCL11      | 351.22±963.23    | 186.47±168.42   |         |

|                   |                   |                   |         |
|-------------------|-------------------|-------------------|---------|
| CCL27             | 51.06±34.37       | 44.33±29.21       |         |
| CXCL1             | 25.89±15.04       | 28.08±14.11       |         |
| CXCL9             | 2419.50±2419.54   | 2291.08±1923.97   |         |
| CXCL10            | 469.49±1132.36    | 130.65±145.70     |         |
| CXCL12            | 46.97±29.71       | 41.49±17.12       |         |
| Chitinase-3-like1 | 48.38±44.27       | 50.89±61.47       |         |
| CSF               | 60.79±64.20       | 45.20±36.59       |         |
| FGFbasic          | 41.53±58.24       | 160.70±185.43     | <0.0001 |
| G-CSF             | 101.87±111.34     | 129.13±100.79     | 0.04    |
| GM-CSF            | 9.82±9.05         | 112.13±81.57      | <0.0001 |
| HGF               | 191.56±212.80     | 147.48±213.44     |         |
| LIF               | 7.55±6.62         | 5.88±4.78         |         |
| M-CSF             | 5.77±4.67         | 3.85±3.06         | 0.04    |
| MIF               | 224.48±229.47     | 321.54±213.02     | 0.03    |
| b-NGF             | 3.44±2.42         | 1.17±0.74         | <0.0001 |
| SCGFb             | 6094.12±5018.49   | 6314.80±5453.49   |         |
| TNFα              | 14734.16±25202.80 | 106.11±88.50      | <0.0001 |
| TNFβ              | 0.62±0.58         | 0.67±0.41         |         |
| MMP1              | 16329.36±14396.10 | 17474.39±20478.62 |         |
| MMP2              | 4963.80±2477.77   | 5304.73±3249.50   |         |



|             |                   |                   |         |
|-------------|-------------------|-------------------|---------|
| MMP3        | 2360.78±1891.49   | 2016.27±1458.80   |         |
| MMP7        | 1397.76±2001.56   | 1516.23±1111.43   |         |
| MMP8        | 24413.25±9076.77  | 17264.39±5173.99  | 0.03    |
| MMP9        | 42343.01±15616.73 | 49439.12±15009.58 |         |
| MMP10       | 32.34±34.31       | 37.73±57.40       |         |
| MMP12       | 11.93±16.85       | 30.24±16.60       | 0.0003  |
| MMP13       | 23.83±11.28       | 33.15±19.68       | 0.02    |
| sCD163      | 15.77±27.68       | 24.53±67.20       |         |
| Osteocalcin | 4.02±3.66         | 11.53±5.85        | 0.0004  |
| Osteopontin | 5.65±4.77         | 12.42±6.54        | 0.01    |
| PDGF-bb     | 965.43±872.96     | 27.59±54.91       | <0.0001 |
| Pentaxin-3  | 23.91±44.94       | 40.64±46.07       | 0.0026  |
| sTNFR1      | 9.05±11.58        | 29.79±33.42       | 0.0006  |
| sTNFR2      | 33.27±43.05       | 26.95±16.57       |         |
| TNFRSF8     | 21.43±12.52       | 8.37±10.13        | 0.0032  |
| TNFSF10     | 45.05±47.38       | 34.05±28.72       |         |
| TNFSF13     | 14993.50±7231.82  | 14283.08±3079.13  |         |
| TNFSF13b    | 69.13±105.32      | 14.86±18.91       | 0.002   |
| TNFSF12     | 55.39±112.54      | 170.31±157.54     | <0.0001 |
| TNFSF14     | 50.04±50.83       | 53.84±70.96       |         |

|        |                   |                 |        |
|--------|-------------------|-----------------|--------|
| TSLP   | 41.69±48.53       | 84.59±80.50     | 0.006  |
| VEGF   | 217.45±295.58     | 422.86±458.97   | 0.002  |
| IFN-α2 | 17.96±17.31       | 15.56±10.39     |        |
| IFNβ   | 46.90±27.82       | 26.22±26.95     | 0.0002 |
| IFNγ   | 10.54±12.12       | 25.68±24.60     | 0.03   |
| IFN-h2 | 15060.12±12582.63 | 9133.16±8437.95 |        |
| IFN-h1 | 307.04±239.56     | 2715.27±3784.50 | 0.006  |

**P. adjust – Benjamini-Hochberg adjusted p-value.**

**Supplementary Table 3. Analysis of acute serum cytokines and MMPs level in NE from RT .**

| Cytokine (pg/mL) | acute (n=17)       | control (n=27)        | convalescent (n=17)     | P adj. value acute - control | P adj. value acute - convalescent | P adj. value control -convalescent |
|------------------|--------------------|-----------------------|-------------------------|------------------------------|-----------------------------------|------------------------------------|
| IL-1 $\alpha$    | 0.21 $\pm$ 0.26    | 0.92 $\pm$ 0.86       | 1.00 $\pm$ 3.26         | 0.001                        |                                   |                                    |
| IL-1 $\beta$     | 17.19 $\pm$ 26.40  | 5.60 $\pm$ 10.43      | 0.55 $\pm$ 0.36         |                              | 0.0001                            | 0.02                               |
| IL-1ra           | 10.65 $\pm$ 16.93  | 84.22 $\pm$ 46.27     | 175.01 $\pm$ 47.65      | <0.0001                      | <0.0001                           | 0.003                              |
| IL-2Ra           | 114.17 $\pm$ 91.31 | 31.73 $\pm$ 25.20     | 27.36 $\pm$ 20.94       | 0.0003                       | 0.0003                            |                                    |
| IL-2             | 19.92 $\pm$ 17.31  | 8.59 $\pm$ 21.09      | 27.35 $\pm$ 16.85       | 0.0002                       |                                   | <0.0001                            |
| IL-3             | 98.23 $\pm$ 57.63  | 70.50 $\pm$ 54.16     | 36.80 $\pm$ 18.03       |                              | 0.002                             |                                    |
| IL-4             | 22.55 $\pm$ 51.38  | 4.51 $\pm$ 3.15       | 2.41 $\pm$ 1.74         | 0.01                         | 0.0003                            |                                    |
| IL-5             | 55.93 $\pm$ 51.71  | 7.16 $\pm$ 9.20       | 0.97 $\pm$ 1.77         | 0.0001                       | <0.0001                           |                                    |
| IL-6             | 28.13 $\pm$ 66.77  | 40.47 $\pm$ 68.10     | 0.44 $\pm$ 0.72         |                              | 0.003                             | 0.0001                             |
| sIL-6Ra          | 65.38 $\pm$ 13.61  | 9226.62 $\pm$ 4935.32 | 2023.61 $\pm$ 1100.21   | 0.0003                       |                                   | 0.03                               |
| sIL-6Rb          | 6.64 $\pm$ 2.78    | 3.80 $\pm$ 2.06       | 26331.78 $\pm$ 16823.57 |                              | <0.0001                           | <0.0001                            |
| IL-7             | 41.36 $\pm$ 50.31  | 8.73 $\pm$ 12.03      | 5.00 $\pm$ 2.53         | <0.0001                      | <0.0001                           |                                    |
| IL-8             | 45.01 $\pm$ 33.75  | 28.68 $\pm$ 21.92     | 21.77 $\pm$ 54.51       |                              | <0.0001                           | 0.001                              |
| IL-9             | 69.84 $\pm$ 82.18  | 37.82 $\pm$ 33.36     | 20.61 $\pm$ 17.19       |                              | 0.03                              |                                    |
| IL-10            | 27.32 $\pm$ 11.55  | 4.47 $\pm$ 2.63       | 1.91 $\pm$ 1.40         | 0.0001                       | <0.0001                           | 0.01                               |
| IL-11            | 61.58 $\pm$ 34.35  | 2.23 $\pm$ 2.92       | 4.66 $\pm$ 3.37         | <0.0001                      | <0.0001                           |                                    |
| IL-12(p70)       | 82.45 $\pm$ 74.41  | 5.86 $\pm$ 7.08       | 3.48 $\pm$ 1.27         | <0.0001                      | <0.0001                           |                                    |
| IL-12(p40)       | 157.70 $\pm$ 76.42 | 105.01 $\pm$ 81.16    | 3.15 $\pm$ 3.03         |                              | <0.0001                           | <0.0001                            |
| IL13             | 3.21 $\pm$ 4.14    | 4.89 $\pm$ 2.93       | 1.12 $\pm$ 1.73         |                              |                                   | 0.003                              |

|            |                  |               |               |         |         |         |
|------------|------------------|---------------|---------------|---------|---------|---------|
| IL-15      | 515.28±523.05    | 20.29±14.56   | 30.01±26.17   | <0.0001 | <0.0001 |         |
| IL-17      | 89.76±127.63     | 19.11±13.19   | 5.60±5.62     | 0.002   | <0.0001 |         |
| IL-16      | 185.37±78.88     | 111.21±61.27  | 101.47±53.49  | 0.01    | 0.01    |         |
| IL-18      | 27.93±38.47      | 8.36±9.11     | 18.77±21.89   |         |         |         |
| IL-19      | 8.65±0.49        | 8.67±31.78    | 15.36±16.01   | 0.001   |         | 0.0004  |
| IL-20      | 1472.56±969.55   | 40.09±26.08   | 8.73±10.53    | <0.0001 | <0.0001 | 0.01    |
| IL-22      | 224.22±60.65     | 9.38±8.33     | 0.42±0.75     | <0.0001 | <0.0001 | 0.005   |
| IL-26      | 301.23±555.13    | 2.80±1.63     | 34.60±32.17   | <0.0001 | 0.02    | 0.004   |
| IL-27(p28) | 518.48±353.32    | 14.53±55.69   | 4.05±3.99     | <0.0001 | <0.0001 |         |
| IL-32      | 2739.28±1102.19  | 35.06±127.71  | 1.39±0.37     | <0.0001 | <0.0001 | 0.003   |
| IL-34      | 16003.23±5604.48 | 101.78±395.27 | 42.42±3.26    | <0.0001 | 0.0003  | 0.03    |
| IL-35      | 11.47±14.36      | 27.97±26.88   | 1.14±1.91     |         | 0.004   | <0.0001 |
| CCL2       | 144.74±106.02    | 44.87±97.65   | 25.26±24.66   | 0.0002  | 0.0001  |         |
| CCL3       | 261.64±232.33    | 9.98±13.35    | 4.09±2.73     | <0.0001 | <0.0001 |         |
| CCL4       | 897.60±1289.39   | 83.99±109.87  | 46.48±24.57   | <0.0001 | <0.0001 |         |
| CCL5       | 198.91±309.19    | 190.37±219.53 | 826.55±697.66 |         | 0.002   | 0.002   |
| CCL7       | 11.64±5.71       | 19.56±18.70   | 2.92±2.27     |         | 0.03    | 0.002   |
| CCL11      | 609.65±1996.51   | 127.78±166.59 | 46.82±36.97   |         | 0.003   |         |
| CCL27      | 49.49±28.02      | 80.72±45.97   | 69.52±60.58   |         |         |         |
| CXCL1      | 28.98±18.84      | 39.75±30.53   | 14.62±22.99   |         | 0.03    | 0.0002  |
| CXCL9      | 3401.23±3693.71  | 229.16±259.92 | 230.04±130.66 | <0.0001 | <0.0001 |         |

|                   |                   |                  |                  |         |         |         |
|-------------------|-------------------|------------------|------------------|---------|---------|---------|
| CXCL10            | 1208.14±2235.60   | 181.54±176.07    | 64.80±89.23      |         | 0.001   | 0.003   |
| CXCL12            | 55.54±32.71       | 55.50±45.14      | 39.85±13.32      |         |         |         |
| Chitinase-3-like1 | 41.70±42.81       | 14526.85±8536.43 | 1559.90±407.88   | <0.0001 | 0.02    | 0.01    |
| CSF               | 47.91±22.02       | 34.03±17.10      | 44.64±18.98      |         |         |         |
| FGFbasic          | 43.95±88.20       | 17.52±17.72      | 16.62±9.60       |         |         |         |
| G-CSF             | 105.14±89.73      | 25.97±31.12      | 64.70±30.59      | <0.0001 |         | <0.0001 |
| GM-CSF            | 9.42±5.41         | 12.07±15.22      | 0.23±0.40        |         | 0.01    | 0.002   |
| HGF               | 163.84±185.06     | 135.06±130.91    | 106.55±111.77    |         |         |         |
| LIF               | 8.50±4.27         | 4.22±3.55        | 2.52±1.71        | 0.02    | 0.002   |         |
| M-CSF             | 6.11±2.67         | 2.56±1.69        | 3.00±6.38        | 0.003   | 0.0002  |         |
| MIF               | 167.35±130.09     | 264.73±255.08    | 21.10±15.14      |         | 0.001   | <0.0001 |
| b-NGF             | 2.53±1.30         | 5.34±17.87       | 0.95±0.23        |         | 0.01    |         |
| SCGFb             | 8262.76±7717.84   | 1791.85±2224.12  | 5179.22±6367.81  | 0.0001  |         |         |
| TNFα              | 15426.96±24198.13 | 42.67±85.27      | 1.23±2.31        |         |         | 0.003   |
| TNFβ              | 0.48±0.57         | 1.49±3.73        | 0.72±0.80        |         |         |         |
| MMP1              | 12461.17±7411.01  | 69.98±78.90      | 315.09±402.21    | <0.0001 | <0.0001 |         |
| MMP2              | 5425.89±3239.72   | 130.71±114.39    | 3994.87±15497.14 | <0.0001 | <0.0001 |         |
| MMP3              | 2791.32±1690.96   | 459.78±367.68    | 414.57±1027.84   | <0.0001 | <0.0001 |         |
| MMP7              | 1543.11±1094.84   | 186.89±272.60    | 728.11±719.54    | <0.0001 |         | 0.01    |
| MMP8              | 22976.60±6847.29  | 47.35±50.55      | 356.24±1251.79   | <0.0001 | <0.0001 |         |
| MMP9              | 39842.37±16035.21 | 1528.85±2417.29  | 1267.21±1742.96  | <0.0001 | <0.0001 |         |

|             |                  |                    |                    |         |         |         |
|-------------|------------------|--------------------|--------------------|---------|---------|---------|
| MMP10       | 25.74±28.84      | 57.65±53.53        | 366.77±354.05      |         | <0.0001 | <0.0001 |
| MMP12       | 7.45±9.13        | 380.88±552.26      | 223.59±186.23      | <0.0001 | <0.0001 |         |
| MMP13       | 23.20±8.07       | 48.74±54.33        | 124.43±87.75       | 0.04    | <0.0001 | 0.0001  |
| sCD163      | 13.05±28.98      | 583.95±434.97      | 21711.96±19298.08  | <0.0001 | <0.0001 | 0.001   |
| Osteocalcin | 4.07±3.50        | 1019.96±1215.61    | 2387.15±1937.42    | <0.0001 | <0.0001 | 0.05    |
| Osteopontin | 4.84±3.72        | 8423.10±4494.07    | 6752.83±5956.84    | <0.0001 | <0.0001 |         |
| PDGF-bb     | 672.90±515.06    | 577.65±774.39      | 983.43±948.23      |         |         |         |
| Pentaxin-3  | 23.50±37.96      | 129.83±125.05      | 4734.17±4238.92    | 0.004   | <0.0001 | <0.0001 |
| sTNFR1      | 9.65±22.75       | 780.57±657.20      | 373.88±228.82      | <0.0001 | 0.0002  |         |
| sTNFR2      | 38.35±56.63      | 5260.21±2924.98    | 52.02±63.56        | <0.0001 |         | <0.0001 |
| TNFRSF8     | 20.08±6.28       | 838.08±1278.79     | 402.64±282.84      | <0.0001 | 0.002   |         |
| TNFSF10     | 27.04±19.56      | 24.14±14.15        | 6.84±6.74          |         | 0.002   | 0.001   |
| TNFSF12     | 24.30±24.88      | 58.26±75.37        | 1.89±2.37          |         | 0.01    | <0.0001 |
| TNFSF13     | 13232.11±7613.66 | 51382.64±165254.05 | 78124.93±122492.68 |         |         |         |
| TNFSF13b    | 59.95±75.15      | 4151.32±1937.30    | 1580.07±1279.25    | <0.0001 | 0.02    | 0.01    |
| TNFSF14     | 42.08±54.54      | 8.01±4.35          | 4.14±4.53          | <0.0001 | <0.0001 | 0.04    |
| TSLP        | 52.23±55.29      | 650.35±3265.11     | 5.77±6.74          |         | <0.0001 | 0.001   |
| VEGF        | 138.71±140.96    | 57.49±55.25        | 15.26±14.52        | 0.03    | <0.0001 | 0.02    |
| IFNα2       | 13.63±5.56       | 11.31±6.61         | 12.14±7.75         |         |         |         |
| IFNβ        | 48.94±20.76      | 23.20±15.78        | 10.69±8.71         | 0.0001  | <0.0001 | 0.02    |
| IFNγ        | 14.87±16.90      | 18.80±41.68        | 12.93±7.81         |         |         |         |

|        |                   |             |             |         |        |       |
|--------|-------------------|-------------|-------------|---------|--------|-------|
| IFN-h2 | 356.81±167.06     | 10.00±10.14 | 20.17±22.45 | <0.0001 | 0.0003 |       |
| IFN-h1 | 14110.19±11048.41 | 8.77±11.06  | 41.53±28.87 | <0.0001 | 0.001  | 0.001 |

**P. adjust – Benjamini-Hochberg adjusted p-value.**

Supplementary table 4. Analysis of cytokines and MMPs in serum of RM NE cases in acute and convalescent stages.

| Cytokine (pg/mL) | acute (n=25)        | control (n=19)         | convalescent (n=25) | P. adjust acute - control | P. adjust acute - convalescent | P. adjust control - convalescent |
|------------------|---------------------|------------------------|---------------------|---------------------------|--------------------------------|----------------------------------|
| IL-1 $\alpha$    | 0.42 $\pm$ 0.39     | 0.65 $\pm$ 1.39        | 0.65 $\pm$ 1.40     |                           |                                |                                  |
| IL-1 $\beta$     | 66.92 $\pm$ 65.26   | 1.57 $\pm$ 0.82        | 102.07 $\pm$ 77.59  | <0.0001                   |                                | <0.0001                          |
| IL-1ra           | 24.07 $\pm$ 18.25   | 85.95 $\pm$ 47.20      | 114.23 $\pm$ 129.28 | 0.001                     | 0.001                          |                                  |
| IL-2Ra           | 139.00 $\pm$ 152.76 | 47.34 $\pm$ 57.00      | 122.29 $\pm$ 116.57 | 0.002                     |                                | 0.001                            |
| IL-2             | 6.74 $\pm$ 9.99     | 4.54 $\pm$ 3.52        | 9.90 $\pm$ 5.53     |                           | 0.004                          | 0.01                             |
| IL-3             | 108.47 $\pm$ 147.82 | 45.02 $\pm$ 57.15      | 116.35 $\pm$ 144.88 | 0.002                     |                                | 0.002                            |
| IL-4             | 51.06 $\pm$ 33.49   | 5.88 $\pm$ 0.99        | 13.33 $\pm$ 8.99    | <0.0001                   | 0.001                          |                                  |
| IL-5             | 84.68 $\pm$ 45.80   | 13.93 $\pm$ 20.59      | 28.51 $\pm$ 17.94   | <0.0001                   | 0.01                           | 0.02                             |
| IL-6             | 92.41 $\pm$ 168.67  | 24.04 $\pm$ 5.61       | 31.12 $\pm$ 20.72   |                           |                                |                                  |
| sIL-6Ra          | 3.12 $\pm$ 3.11     | 11644.65 $\pm$ 2489.66 | 14.10 $\pm$ 10.70   | <0.0001                   | 0.04                           | <0.0001                          |
| sIL-6Rb          | 54.14 $\pm$ 18.82   | 5.12 $\pm$ 1.39        | 68.60 $\pm$ 142.68  | <0.0001                   |                                | <0.0001                          |
| IL-7             | 57.60 $\pm$ 47.22   | 14.64 $\pm$ 7.45       | 17.74 $\pm$ 3.31    | 0.001                     |                                |                                  |
| IL-8             | 14.68 $\pm$ 13.96   | 22.23 $\pm$ 19.46      | 11.55 $\pm$ 18.84   |                           |                                | 0.01                             |
| IL-9             | 231.06 $\pm$ 155.41 | 57.98 $\pm$ 33.69      | 131.40 $\pm$ 138.00 | 0.0002                    | 0.02                           |                                  |
| IL-10            | 35.19 $\pm$ 27.70   | 3.22 $\pm$ 1.95        | 6.15 $\pm$ 11.36    | <0.0001                   | <0.0001                        |                                  |
| IL-11            | 28.21 $\pm$ 18.51   | 5.28 $\pm$ 8.61        | 49.30 $\pm$ 58.33   | 0.0001                    |                                | 0.001                            |
| IL-12(p70)       | 16.00 $\pm$ 12.35   | 2.74 $\pm$ 2.46        | 2.15 $\pm$ 1.99     | <0.0001                   | <0.0001                        |                                  |
| IL-12(p40)       | 169.81 $\pm$ 134.22 | 89.59 $\pm$ 109.57     | 197.19 $\pm$ 149.22 | 0.02                      |                                | 0.01                             |
| IL13             | 23.24 $\pm$ 23.84   | 6.14 $\pm$ 1.24        | 27.26 $\pm$ 14.13   | 0.02                      |                                | 0.0003                           |



|            |                 |               |                 |         |         |         |
|------------|-----------------|---------------|-----------------|---------|---------|---------|
| IL-15      | 1525.43±1233.32 | 20.60±8.58    | 70.52±32.69     | <0.0001 | 0.0002  | 0.0003  |
| IL-17      | 128.07±69.62    | 31.68±9.48    | 89.45±40.36     | 0.0001  |         | 0.003   |
| IL-16      | 170.31±116.09   | 103.53±79.14  | 185.96±148.62   | 0.02    |         | 0.02    |
| IL-18      | 23.80±22.48     | 4.23±4.68     | 26.42±23.66     | 0.01    |         | 0.004   |
| IL-19      | 21.23±12.77     | 3.30±2.64     | 25.92±17.54     | <0.0001 |         | <0.0001 |
| IL-20      | 475.41±320.87   | 57.85±83.75   | 4.33±2.82       | 0.002   | <0.0001 | 0.0003  |
| IL-22      | 746.94±398.49   | 6.65±9.23     | 28.63±15.63     | <0.0001 | 0.0002  | 0.003   |
| IL-26      | 496.67±440.54   | 3.75±4.84     | 7.07±3.78       | <0.0001 | <0.0001 | 0.02    |
| IL-27(p28) | 821.18±676.19   | 2.04±0.93     | 19.65±11.05     | <0.0001 | 0.001   | <0.0001 |
| IL-32      | 1662.57±1626.24 | 8.66±8.28     | 27.30±19.20     | <0.0001 | 0.002   | 0.01    |
| IL-34      | 7214.97±5564.08 | 21.35±12.67   | 20.89±14.13     | <0.0001 | <0.0001 |         |
| IL-35      | 61.27±62.04     | 22.07±18.33   | 15.08±18.09     |         | 0.002   |         |
| CCL2       | 1500.42±801.92  | 25.15±17.57   | 35.29±15.54     | <0.0001 | <0.0001 |         |
| CCL3       | 1133.72±1123.01 | 4.57±1.55     | 7.31±6.18       | <0.0001 | <0.0001 |         |
| CCL4       | 4353.96±3455.27 | 68.31±42.84   | 117.06±69.14    | <0.0001 | <0.0001 |         |
| CCL5       | 324.46±166.02   | 149.06±99.39  | 241.95±331.14   | 0.02    | 0.02    |         |
| CCL7       | 28.89±23.91     | 16.21±28.52   | 39.63±27.25     | 0.02    |         | 0.0001  |
| CCL11      | 186.47±168.42   | 139.90±53.17  | 97.04±165.78    |         | 0.01    | 0.01    |
| CCL27      | 44.33±29.21     | 61.52±43.22   | 44.18±33.94     |         |         |         |
| CXCL1      | 28.08±14.11     | 28.36±20.01   | 43.70±34.41     |         |         |         |
| CXCL9      | 2291.08±1923.97 | 266.03±138.96 | 1900.74±1775.93 | 0.0001  |         | 0.001   |

|                   |                   |                  |                   |         |         |         |
|-------------------|-------------------|------------------|-------------------|---------|---------|---------|
| CXCL10            | 130.65±145.70     | 218.47±116.74    | 37.31±26.93       |         | 0.003   | 0.00001 |
| CXCL12            | 41.49±17.12       | 44.69±56.83      | 47.96±30.72       |         |         |         |
| Chitinase-3-like1 | 50.89±61.47       | 14972.82±5142.39 | 35152.95±17378.32 | <0.0001 | <0.0001 | 0.04    |
| CSF               | 45.20±36.59       | 31.73±18.21      | 47.75±37.23       |         |         |         |
| FGFbasic          | 160.70±185.43     | 19.56±8.97       | 35.05±25.50       | <0.0001 | 0.01    |         |
| G-CSF             | 129.13±100.79     | 41.53±28.27      | 55.88±73.33       | 0.0002  | 0.0003  |         |
| GM-CSF            | 112.13±81.57      | 18.58±5.70       | 28.06±20.78       | 0.001   | 0.003   |         |
| HGF               | 147.48±213.44     | 105.01±115.09    | 147.37±105.14     |         |         |         |
| LIF               | 5.88±4.78         | 6.29±7.80        | 7.76±6.90         |         |         |         |
| M-CSF             | 3.85±3.06         | 3.70±4.26        | 4.21±2.96         |         |         |         |
| MIF               | 321.54±213.02     | 149.44±103.21    | 426.54±324.95     | 0.03    |         | 0.01    |
| b-NGF             | 1.17±0.74         | 1.33±2.44        | 1.40±1.31         | 0.02    |         | 0.02    |
| SCGFb             | 6314.80±5453.49   | 1794.47±1962.12  | 5913.39±5584.19   | 0.001   |         | 0.002   |
| TNFα              | 106.11±88.50      | 40.24±39.06      | 96.73±61.84       | 0.01    |         | 0.01    |
| TNFβ              | 0.67±0.41         | 1.12±2.14        | 0.87±1.28         |         |         |         |
| MMP1              | 17474.39±20478.62 | 109.47±112.44    | 343.47±250.74     | <0.0001 | <0.0001 |         |
| MMP2              | 5304.73±3249.50   | 149.65±122.24    | 138.02±140.69     | <0.0001 | <0.0001 |         |
| MMP3              | 2016.27±1458.80   | 349.75±315.03    | 1493.00±777.72    | <0.0001 |         | 0.0002  |
| MMP7              | 1516.23±1111.43   | 280.81±222.95    | 1001.54±787.44    | 0.0002  |         | 0.01    |
| MMP8              | 17264.39±5173.99  | 12.83±11.76      | 51.68±113.20      | <0.0001 | <0.0001 |         |
| MMP9              | 49439.12±15009.58 | 2079.50±1165.23  | 3409.97±3945.15   | <0.0001 | <0.0001 |         |

|             |                  |                   |                   |         |         |         |
|-------------|------------------|-------------------|-------------------|---------|---------|---------|
| MMP10       | 37.73±57.40      | 94.88±119.02      | 188.57±149.13     |         | <0.0001 | 0.001   |
| MMP12       | 30.24±16.60      | 531.47±408.61     | 288.80±181.70     | <0.0001 | <0.0001 |         |
| MMP13       | 33.15±19.68      | 53.13±19.16       | 96.59±71.31       | 0.03    | 0.0001  |         |
| sCD163      | 24.53±67.20      | 724.96±461.65     | 7514.74±7090.63   | <0.0001 | <0.0001 |         |
| Osteocalcin | 11.53±5.85       | 1032.61±478.47    | 5852.06±8744.62   | <0.0001 | <0.0001 |         |
| Osteopontin | 12.42±6.54       | 6695.92±3856.69   | 5095.55±10445.01  | <0.0001 | 0.0001  |         |
| PDGF-bb     | 27.59±54.91      | 619.65±527.23     | 2053.87±1291.68   | <0.0001 | <0.0001 | 0.003   |
| Pentaxin-3  | 40.64±46.07      | 207.58±209.65     | 306.77±316.05     | 0.01    | 0.0001  |         |
| sTNFR1      | 29.79±33.42      | 1098.69±593.68    | 5758.27±4055.51   | <0.0001 | <0.0001 | 0.01    |
| sTNFR2      | 26.95±16.57      | 5866.91±4089.70   | 38.22±35.78       | <0.0001 |         | <0.0001 |
| TNFRSF8     | 8.37±10.13       | 816.89±738.93     | 1316.35±1102.28   | <0.0001 | <0.0001 |         |
| TNFSF10     | 34.05±28.72      | 31.67±22.63       | 39.43±35.42       |         |         |         |
| TNFSF12     | 170.31±157.54    | 52.52±42.82       | 62.42±53.61       | 0.01    | 0.02    |         |
| TNFSF13     | 14283.08±3079.13 | 13490.18±18639.03 | 15272.31±23016.26 |         |         |         |
| TNFSF13b    | 14.86±18.91      | 4343.57±2830.40   | 3720.91±3770.34   | <0.0001 | <0.0001 |         |
| TNFSF14     | 53.84±70.96      | 6.70±2.39         | 13.55±12.82       | <0.0001 | 0.01    | 0.01    |
| TSLP        | 84.59±80.50      | 20.23±9.58        | 53.11±61.38       | 0.001   |         |         |
| VEGF        | 422.86±458.97    | 59.99±41.20       | 150.89±144.90     | <0.0001 | 0.02    | 0.02    |
| IFN-α2      | 15.56±10.39      | 11.73±9.99        | 17.16±11.37       | 0.03    |         | 0.01    |
| IFNβ        | 26.22±26.95      | 26.07±7.78        | 31.90±22.87       |         |         |         |
| IFNγ        | 25.68±24.60      | 20.45±8.74        | 16.52±12.92       |         |         |         |

|        |                 |             |             |         |         |  |
|--------|-----------------|-------------|-------------|---------|---------|--|
| IFN-h1 | 2715.27±3784.50 | 14.86±13.26 | 5.43±3.64   | <0.0001 | <0.0001 |  |
| IFN-h2 | 9133.16±8437.95 | 13.66±6.02  | 30.76±33.57 | <0.0001 | <0.0001 |  |

**P. adjust – Benjamini-Hochberg adjusted p-value.**
